# Supplementary material
Source: PubMed Central journal article supplement (PMC8859842)
Supplement: NIHMS1778767-supplement-1.pdf [file NIHMS1778767-supplement-1.pdf]

**Supplemental Table S1. PLASMIC and French Scores for TTP and other TMA cohorts by age, 2006-2018**

|            |     | Age group (years) |                  |                  |                  |                 |                  |
|------------|-----|-------------------|------------------|------------------|------------------|-----------------|------------------|
|            |     | 18-39             |                  | 40-59            |                  | ≥ 60            |                  |
| Risk score |     | TTP               | Non-TTP TMA      | TTP              | Non-TTP TMA      | TTP             | Non-TTP TMA      |
| PLASMIC    | 0-4 | 1/21<br>(4.8%)    | 10/18<br>(55.6%) | 1/12<br>(8.3%)   | 4/12<br>(33.3%)  | 3/11<br>(27.3%) | 7/14<br>(50.0%)  |
|            | 5-7 | 20/21<br>(95.2%)  | 8/18<br>(44.4%)  | 11/12<br>(91.7%) | 8/12<br>(66.7%)  | 8/11<br>(72.7%) | 7/14<br>(50.0%)  |
| French     | 0-1 | 7/21<br>(33.3%)   | 22/23<br>(95.7%) | 5/12<br>(41.7%)  | 15/16<br>(93.8%) | 6/11<br>(54.5%) | 11/15<br>(73.3%) |
|            | 2   | 14/21<br>(66.7%)  | 1/23<br>(4.3%)   | 7/12<br>(58.3%)  | 1/16<br>(6.3%)   | 5/11<br>(45.5%) | 4/15<br>(26.7%)  |

Abbreviations: TMA, thrombotic microangiopathy; TTP, thrombotic thrombocytopenic purpura.

Note: Data presented as number/total (%).

TTP diagnosis was confirmed by ADAMTS13 activity in patients who were diagnosed in 2006-2018.

For PLASMIC score, 1 point was given for each of the following: (1) platelet < 30 x 10<sup>9</sup>/L; (2) hemolysis [reticulocyte count > 2.5%, undetectable haptoglobin, or indirect bilirubin > 2 mg/dL]; (3) absence of active cancer; (4) absence of solid-organ or stem cell transplant; (5) MCV < 90 fL; (6) INR < 1.5; and (7) serum creatinine < 2.0 mg/dL.

For French score, 1 point was given for each of the following: (1) platelet < 30 x 10<sup>9</sup>/L and (2) serum creatinine ≤ 2.26 mg/dL.
